# Supplementary material for: Emulating interacting waveguide quantum electrodynamics with wire metamaterials
Source: Research Square preprint supplement (doi:10.21203/rs.3.rs-827978/v1), 2021-08-26
Supplement: Supplementary file 1 [file 303350f3d0633b8c5df75dc3.pdf]

# Supplementary Information for “Emulating interacting waveguide quantum electrodynamics with wire metamaterials”

Evgeniy A. Koreshin,<sup>1,\*</sup> Denis I. Sakhno,<sup>1</sup> Alexander N. Poddubny,<sup>2,1,†</sup> and Pavel A. Belov<sup>1</sup>

<sup>1</sup>*ITMO University, St. Petersburg 197101, Russia*

<sup>2</sup>*Ioffe Institute, St. Petersburg 194021, Russia*

## I. SUPPLEMENTARY FIGURES

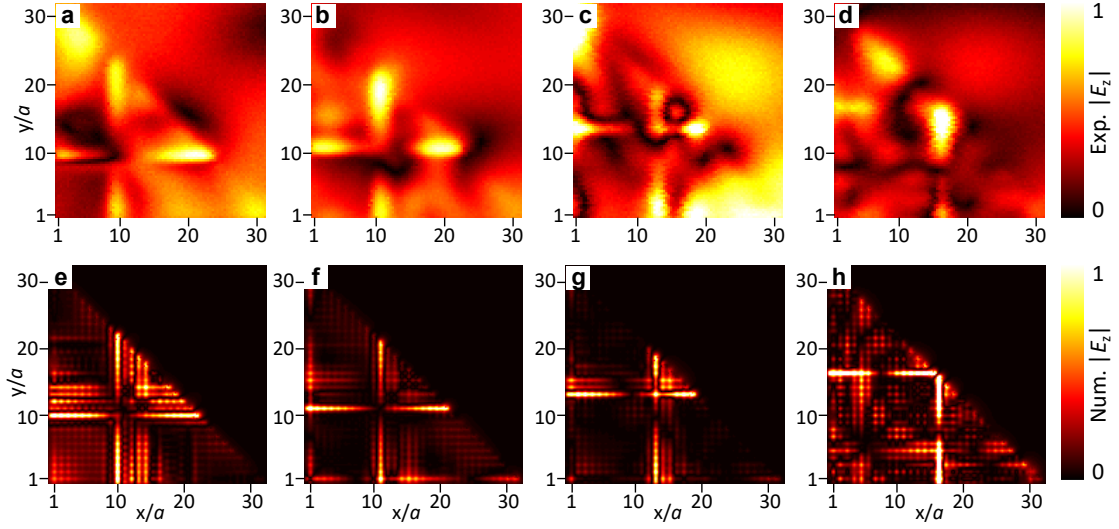

FIG. S1. Localized modes observed in the numerical simulations (e-h) and corresponding experimentally obtained near field distributions.

---

\* evgeniy.koreshin@metalab.ifmo.ru

† poddubny@coherent.ioffe.ru

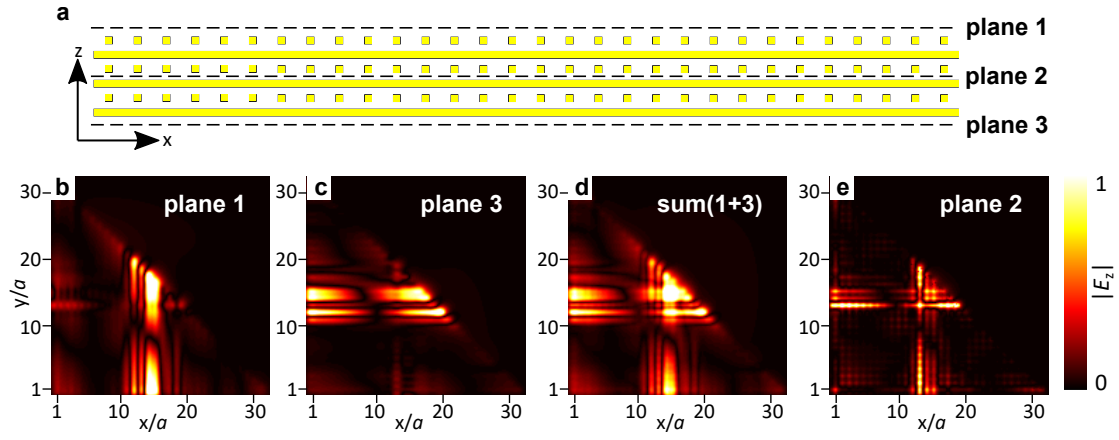

FIG. S2. Comparison of the electric field distributions obtained numerically in the central section of the structure with the sum of electric fields near its top and bottom interfaces. (a) Side view of the triangle sample with three planes (dashed lines) where electric fields have been calculated. (b-c) Electric fields outside the structure and (d) their sum. (e) Electric field in the central section of the structure.
